# The role of host phenology for parasite transmission

Hannelore MacDonald<sup>1,\*</sup>, Erol Akçay<sup>1</sup>, Dustin Brisson<sup>1</sup>

1. Department of Biology, University of Pennsylvania, Philadelphia, Pennsylvania 19104;

\* Corresponding author; e-mail: [haime@sas.upenn.edu](mailto:haime@sas.upenn.edu)

## Abstract

Phenology is a fundamental determinant of species distributions, abundances, and interactions. In host-parasite interactions, host phenology can affect parasite fitness due to the temporal constraints it imposes on host contact rates. However, it remains unclear how parasite transmission is shaped by the wide range of phenological patterns observed in nature. We develop a mathematical model of the Lyme disease system to study the consequences of differential tick developmental-stage phenology for the transmission of *B. burgdorferi*. Incorporating seasonal tick activity can increase *B. burgdorferi* fitness compared to continuous tick activity but can also prevent transmission completely. Slightly asynchronous tick developmental-stage phenology results in high transmission efficiency of *B. burgdorferi* compared to synchronous tick activity. Surprisingly, *B. burgdorferi* is eradicated as asynchrony increases further due to feedback from mouse population dynamics. These results highlight the importance of phenology, a ubiquitous driver of species interactions, for the fitness of a parasite.

## Introduction

Behaviors or traits that vary seasonally, termed phenology in the ecological literature, impact both the type and strength of ecological interactions within populations and communities.<sup>1–5</sup> For example, seasonally-matching flowering times and pollinator activity periods is a key driver of short- and long-term population dynamics of both plants and insects.<sup>6–11</sup> Differences in the seasonal activities of interacting species over time or geography, caused by changes in climatic and environmental features, can result in population extinctions and in population explosions.<sup>12–18</sup> Although the majority of studies focus on the phenology of plants and their interacting species, the seasonal activity of hosts or disease vectors is likely to also have large impacts on the population dynamics of infectious microbes.

The impact of phenology on disease transmission dynamics can be prominent in disease systems involving multiple host species or life-stages because the frequency and type of interactions among species or stages, which is determined by their seasonal activities, determines the frequency and type of pathogen transmission between species or stages. For instance, consider the cestode *Schistocephalus solidus* that infects young three-spined stickleback fish as an intermediate host, multiplies within the fish before the fish is eaten by the definitive bird host (belted kingfisher).<sup>19,20</sup> The parasite reproduces sexually within the bird who defecate parasite eggs that infect juvenile fish.<sup>19</sup> However, this disease system occurs in North American lakes that freeze over winter, causing both fish reproduction and bird migration to be temporally restricted within each year. A temporal mismatch in the bird and fish phenologies, such as fish reproduction occurring prior to the return migration of birds, could reduce or eliminate cestode transmission among its hosts. Further, variation in the environmental cues affecting the seasonal activity patterns of the birds and fish either among lakes or across years is likely to have a quantitative, if not qualitative, impact on disease transmission dynamics.

Parasites transmitted by hard bodied ticks (family Ixodidae) represent an important case study for the impact of phenology on disease systems. Ixodid ticks have three distinct developmental stages. The phenology of each tick developmental stage differs dramatically among regions resulting in a range of phenological patterns. Variation in the timing of tick developmental stages may contribute to differences in tick-borne parasite transmission.<sup>21–23</sup> Existing data for *Borrelia burgdorferi*, the etiological agent of human Lyme disease, provides baseline expectations for the transmission consequences of tick phenological patterns, making this a good system to study the effects of the general conceptual issue of how vector phenology drives parasite transmission (also see Fig. 1). Larvae, the first developmental stage, hatch uninfected but can acquire *B. burgdorferi* while feeding on an infected host. Fed larvae molt to nymphs that can then transmit *B. burgdorferi* to small vertebrate hosts (primarily mice, chipmunks, and shrews) during nymphal feeding. Fed nymphs molt to adults that feed on large vertebrates before laying eggs that hatch as larvae. In the Northeastern US, the nymphal stage is active in early summer while larvae from a different cohort feed in late summer, providing an opportunity for the infection to be transmitted from nymphs to larvae through the vertebrate hosts. This sequential feeding pattern might contribute to higher infection prevalences in the Northeastern US relative to Southern US or the Midwest, where the sequential activity patterns are less pronounced.<sup>24,25</sup> However, the precise impact of tick phenology of infection dynamics has not yet been modeled.

Here we present a model of the Lyme disease system to provide insight into the exact nature of how differential phenology affects thresholds for parasite persistence. To that end, we utilize a modeling framework that combines continuous time within-season dynamics with discrete time between-season dynamics<sup>2</sup> to assess the qualitative and quantitative impacts of phenology on disease transmission dynamics and thresholds for parasite persistence. Our modeling framework explicitly considers the transmission dynamics of disease systems where hosts have seasonal, rather than continuous, activity patterns. This modeling framework

benefits from highly-flexible emergence functions that accommodate the seasonal patterns of multiple host types. We derive both short-term, within-season transmission dynamics and long-term behavior and equilibria using our framework. We show how the transmission efficiency of *B. burgdorferi* can increase or decrease due to differences in tick phenology, specifically. While we use the Lyme disease system to describe our approach, the modeling framework applies to all parasites that require multiple transmission events to complete their life cycle (e.g. West Nile Virus, leishmaniasis, rabies virus).

## Model

We model the transmission of *B. burgdorferi* between *I. scapularis* and a main vertebrate reservoir, the white-footed mouse *Peromyscus leucopus*.<sup>26</sup> Our model tracks the within-season dynamics of nymphal and larval population activity and uses these dynamics to compute the between season changes in overall infection prevalence.

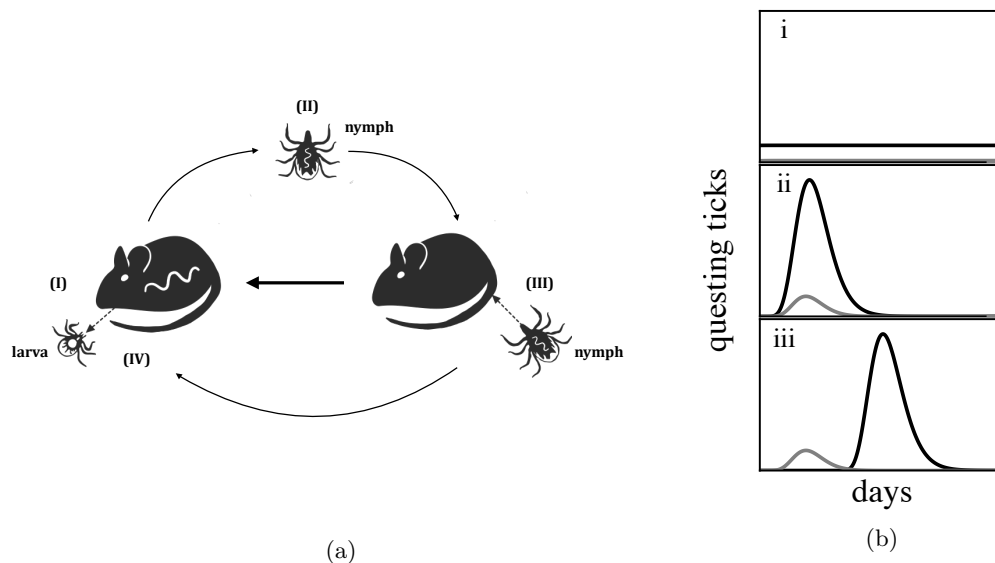

Figure 1: How does tick life-stage phenology impact the transmission of *B. burgdorferi*? (a.) Larval ticks hatch uninfected<sup>27</sup> and can acquire *B. burgdorferi* by feeding on an infected small animal (I). Infected larvae molt to nymphs and becoming active the following year (II). Small animals are infected when fed upon by an infected nymph (III). Fed nymphs molt to adults and feed on larger animals prior to laying eggs that hatch the following year (IV). Adult ticks play a minor role in the transmission ecology of *B. burgdorferi* and are thus not explicitly modeled. (b.) The seasonal activity patterns of the tick developmental stages vary from near-continuous activity of all stages throughout the year (i)<sup>24</sup> to developmental stages with temporally divergent activity seasons of short-duration within the US (iii).<sup>28</sup> This latter tick-stage phenology (iii) is thought to result in highly-efficient transmission of *B. burgdorferi* as large proportions of hosts are infected by nymphs (III) prior to larval activity (I). Note that the larvae and nymphs that feed in the same summer are from different cohorts.

## Within-season dynamics

Within-season dynamics describe the duration of nymphal and larval emergence and feeding activity in continuous time from the beginning of each season ( $t = 0$ ) to the end ( $t = \tau$ ). The life-cycle we model is depicted in Figure 1a. Ticks start their life-cycle uninfected, but may pick up the infection as larvae from infected mice. Larvae then overwinter and emerge as nymphs in the next season, who can transmit the infection to new mice when they feed on them. The state variables  $L_{\bullet}(t)$ ,  $N_{\bullet}(t)$ , and  $M_{\bullet}(t)$  represent larval, nymphal, and mouse populations, where the subscripts denote whether ticks are questing ( $q$ ) or fed ( $f$ ), as well as infection status of ticks and mice ( $i$  for infected,  $u$  for uninfected). Thus,  $L_q$  denotes the questing larvae (who by definition cannot be infected), while  $L_{if}$  denotes fed larvae that are infected. The within season dynamics are given by the following system of ordinary differential equations:

$$\frac{dL_q}{dt} = \hat{L}g_l(t, \theta_l) - L_q(\gamma_l(M_i + M_u) + \mu_l), \quad (1a)$$

$$\frac{dL_{if}}{dt} = \beta_{ml}\gamma_l L_q M_i, \quad (1b)$$

$$\frac{dL_{uf}}{dt} = \gamma_l L_q (M_u + (1 - \beta_{ml})M_i), \quad (1c)$$

$$\frac{dN_{iq}}{dt} = \hat{N}_i g_n(t, \theta_n) - N_{iq}(\gamma_n(M_i + M_u) + \mu_n), \quad (1d)$$

$$\frac{dN_{uq}}{dt} = \hat{N}_u g_n(t, \theta_n) - N_{uq}(\gamma_n(M_i + M_u) + \mu_n), \quad (1e)$$

$$\frac{dN_f}{dt} = \gamma_n(N_{iq} + N_{uq})(M_i + M_u), \quad (1f)$$

$$\frac{dM_u}{dt} = b(M)(M_i + M_u) - \mu_m M_u - \beta_{nm}\gamma_n N_{iq} M_u, \quad (1g)$$

$$\frac{dM_i}{dt} = \beta_{nm}\gamma_n N_{iq} M_u - \mu_m M_i. \quad (1h)$$

Here,  $\hat{L}$  represents the total larval population to emerge each year, which is determined by the number of nymphs that have successfully fed the previous year, survived to adulthood, and reproduced (given by equation (4) below). The function  $g_l(t, \theta_l)$  is the probability density function describing the shape of larval emergence. The parameters of this function, represented by  $\theta_l$ , specify the timing and shape of the larval emergence distribution (see Appendix A for more detail). Similarly,  $\hat{N}_i$  and  $\hat{N}_u$  represent the total number of questing infected and uninfected nymphs that emerge within a year as determined by the number of infected and uninfected larvae at the end of the previous year and the probability of over-winter survival (see equations (2) and (3)). The function  $g_n(t, \theta_n)$  is the probability density function describing the shape of questing nymphal emergence, with  $\theta_n$  specifying the shape (see Appendix A for more detail).  $\gamma_l$  and  $\gamma_n$  are the density dependent contact rates between mice and larvae or nymphs and  $\mu_l$  and  $\mu_n$  are larval and nymphal death rates. The  $\beta$  terms describe transmission probabilities with subscripts describing the direction of transmission (*e.g.*  $ml$  denotes transmission from mice to larvae).  $M = M_u + M_i$ ,  $b(M)$  is the density dependent mouse birth rate and  $\mu_m$  is the mouse death rate.

We solve equations 1a-g analytically, assuming the host population is at equilibrium and a constant tick emergence function (see Appendix B for details).

## Between-season dynamics

The within-season dynamics described above are coupled to recurrence equations that describe the survival of larvae and nymphs between years. The total number of infected and uninfected nymphs ( $\hat{N}_i(T+1)$  and  $\hat{N}_u(T+1)$ ) that emerge in a given year are given as a function of the number of infected and uninfected fed larvae at the end of the previous year ( $L_{if}(\tau)$  and  $L_{uf}(\tau)$ ) as follows:

$$\hat{N}_i(T+1) = \sigma_{li}(L_{if}(\tau), L_f(\tau)) = \frac{L_{if}(\tau)}{1 + \alpha L_f(\tau)} \quad (2)$$

$$\hat{N}_u(T+1) = \sigma_{lu}(L_{uf}(\tau), L_f(\tau)) = \frac{L_{uf}(\tau)}{1 + \alpha L_f(\tau)}, \quad (3)$$

where  $L_{if}(\tau)$  and  $L_{uf}(\tau)$  are the infected and uninfected larval abundances at the end of the previous season and  $L_f(\tau) = L_{if}(\tau) + L_{uf}(\tau)$ , found by integrating (1b) and (1c), respectively, over the season from (0,  $\tau$ ) as shown in Appendix B. This survival function takes into account the density dependence of larval overwinter survival and moulting.

Similarly, the total fed nymphal population at the end of the year  $N_f(\tau)$  gives rise to the population of larvae,  $\hat{L}(T+1)$ , that emerges the following year as described by the map:

$$\hat{L}(T+1) = \sigma_n N_f(\tau) \quad (4)$$

where  $N_f(\tau)$  is found by integrating (1e) over the season from (0,  $\tau$ ) as shown in Appendix B.  $\sigma_n$  is the expected number of eggs produced per fed nymph, after accounting for survival to adulthood and for fecundity.

With these functions, we can write the discrete, between season mapping of the total larval and nymphal abundances from one year to the next:

$$\hat{L}(T+1) = \hat{N}(T) \sigma_n \phi_n, \quad (5)$$

$$\hat{N}_i(T+1) = \sigma_{li}(\hat{L}(T) \phi_{li}(\hat{N}_i(T)), \hat{L}(T) \phi_l), \quad (6)$$

$$\hat{N}_u(T+1) = \sigma_{lu}(\hat{L}(T) \phi_{lu}(\hat{N}_i(T)), \hat{L}(T) \phi_l), \quad (7)$$

where  $\phi_n$  and  $\phi_l$  denote the fraction of emerging nymphs and larvae that feed over a growing season as calculated from within-season dynamics (e.g.,  $\phi_l = \frac{L_{uf}(\tau) + L_{if}(\tau)}{\hat{L}(T)}$ ; see Appendix A), and  $\phi_{li}(\hat{N}_i(T))$  and  $\phi_{lu}(\hat{N}_i(T))$  are functions of  $\hat{N}_i(T)$  that denote the fraction of emerging larvae that become infected or remain uninfected through feeding as calculated from within-season dynamics (e.g.,  $\phi_{li}(\hat{N}_i(T)) = \frac{L_{if}(\tau)}{\hat{L}(T)}$ ; see Appendix B).

We next calculate the basic reproductive number,  $R_0$ , of the parasite to quantify the impact of phenology for the efficiency of parasite transmission, *i.e.* parasite fitness.  $R_0$  represents the average number of new infections caused by a single infected individual in an otherwise naïve population of mammals and ticks,<sup>29</sup> which gives the threshold for parasite invasibility given the phenology of both tick stages.  $R_0$  is computed as the number of infected nymphs that emerge in year  $T+1$  produced by a single infected nymph that emerged in year  $T$  in an otherwise uninfected population. Specifically, we consider a tick population that is at its demographic equilibrium without the infection, solved by setting  $\hat{L}(T+1) = \hat{L}(T) = \hat{L}^*$ ,  $\hat{N}_u(T+1) = \hat{N}_u(T) = \hat{N}^*$ , and  $\hat{N}_i(T=0)$  in equations (5) and (7). At this demographic equilibrium,  $R_0$  of

a rare parasite infection is given as follows:

$$R_0 = \frac{\hat{N}_i(T+1)}{\hat{N}_i(T)} = \sigma_{li}(\hat{L}^* \phi_{li}(\hat{N}_i(T), \hat{L}^* \phi_l)) \quad (8)$$

$$R_0 = \frac{\hat{L}^* \phi_{li}(\hat{N}_i(T))}{1 + \alpha \hat{L}^* \phi_l} \quad (9)$$

This  $R_0$  accounts for transmission between cohorts of ticks through intermediate mouse hosts in a given feeding season. When  $\hat{N}_i(T) = 1$ , parasites persist in phenological scenarios where  $\hat{N}_i((T+1)) \geq 1$  (*i.e.* slope is greater than or equal to unity). Details of the analytical approach are in Appendix C.

## Results

The transmission of *B. burgdorferi* from nymphs to mice to larvae is inefficient in systems where either nymphs or larvae are continuously active (Fig. 2). Controlling for total population sizes, when nymphal feeding is evenly spread throughout the year, few nymphs feed at any give time, resulting in limited nymph-to-mouse transmission events. The proportion of infected mice remains constantly low as new infections occur at a similar rate as mouse mortality which replaces older, potentially infected mice with uninfected juveniles. Larval ticks rarely encounter infected mice, thus limiting mouse-to-tick transmission events. By contrast, seasonal nymphal activity concentrates nymph-to-mouse transmission events in time, causing a seasonal peak in mouse infection prevalence that decays with mouse population turnover (Fig. 2). The duration of the nymphal activity period is negatively correlated with the rate at which infected mice accumulate as well as the maximum mouse infection prevalence (*e.g.* small  $l_n$  in Fig. 2). That is, nymphal activity periods of greater duration result in a lower maximum mouse infection prevalence that peaks later in the season (Fig. 2). Larval ticks that feed at or around the peak in mouse infection prevalence are more likely to encounter an infected mouse and acquire *B. burgdorferi* before molting to nymphs.

The transmission efficiency of *B. burgdorferi*, quantified by the basic reproductive number, is greatest when larval activity is concentrated around the peak in the mouse infection prevalence, thus increasing the probability that each larva will feed on an infected mouse (Fig. 3A. and Fig. 4A). Larvae that are active substantially after the nymphal activity period ends are likely to feed on an uninfected mouse due to the decay in mouse infection prevalence caused by mouse population turnover (Fig. 3B and Fig. 4B). Similarly, larval activity periods that begin prior to nymphal activity periods result in the majority of larvae feeding on uninfected mice that have not acquired an infection from a feeding nymph.

The effect of the duration of larval emergence depends on whether or not larval emergence coincides with nymphal emergence: for synchronous larval and nymphal emergence, concentrated larval emergence tends to decrease the basic reproductive number (Fig. 5). This happens because with concentrated larval emergence, most larval feeding occurs before nymphs have a chance to increase mouse infection. Conversely, when larvae emerge later than nymphs, concentrated larval emergence tends to increase the basic reproductive number of *B. burgdorferi* (Fig. 6). This happens because with asynchronous emergence, mouse infection prevalence is already high when larvae begin emerging (Fig. 6A), and concentrated emergence results in most larvae feeding when the prevalence of infection is still high. In both cases, the basic reproductive number decreases with very broad larval emergence due to mouse turnover (Fig. 3C, Fig. 4C, Fig. 6B, Fig. 5B).

## Discussion

Phenology is a fundamental component of all ecological interactions. Interactions between organisms such as competition, predation, and parasitism are predicated on temporal overlap of interacting species or life-stages. Similarly, host or vector phenology impacts parasite fitness by temporally structuring transmission events between interacting hosts or life stages. Host or vector phenological patterns can even determine whether a pathogen is highly abundant or is unable to persist (Fig. 3). The ubiquity of seasonal activity among hosts and vectors, as well as the geographic variation in seasonal activity patterns, underscores the importance of phenology for the distribution and abundance of many pathogenic microbes including malaria, rabies, tapeworm, and Lyme disease.<sup>23,30-32</sup> In the Lyme disease system, the phenology of tick developmental stages can determine the fitness of *B. burgdorferi* and is predictive of how regional differences in tick phenology drive differences in *B. burgdorferi* distribution and abundance.

The observed fitness of *B. burgdorferi* in different Lyme disease foci in North America correspond with model predictions. For example, transmission efficiency is relatively low in the Southeastern United States where the activity of both tick developmental stages are comparably continuous throughout the year (Fig. 2).<sup>24</sup> By contrast, *B. burgdorferi* transmission efficiency in the Northeastern and mid-Atlantic regions is high due to the pronounced phenological patterns of nymphal and larval ticks (Fig. 2).<sup>23</sup> The concentrated nymphal activity period temporally concentrates tick-to-mouse transmission events, causing a temporary peak in mouse infection prevalence slightly after nymphal feeding (Fig 2). Larval feeding activity

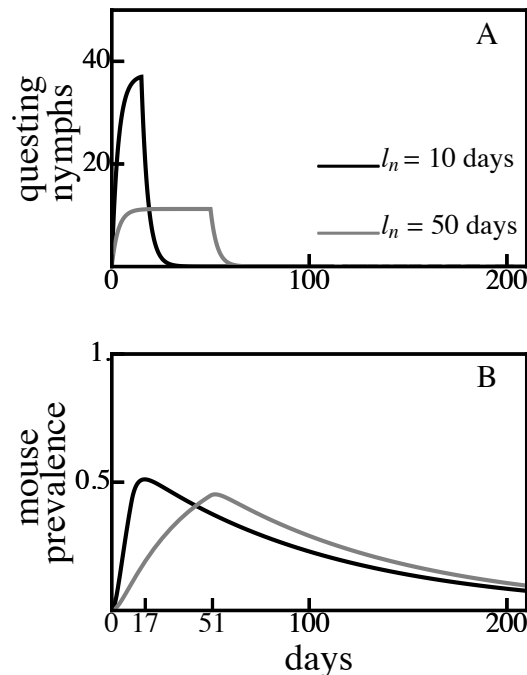

Figure 2: Concentrated nymphal emergence durations ( $l_n = 10$  days, (A)) result in a higher and earlier mouse infection prevalence peak compared to longer nymphal emergence durations ( $l_n = 50$  days (B)) for the same total tick population sizes. For example, a nymphal activity duration of 10 days ( $l_n = 10$  days, (B)) results in peak mouse infection prevalence occurring on day 17 while  $l_n = 50$  days results in peak mouse infection prevalence occurring on day 51. In both models, 25% of emerging nymphs are infected,  $\mu_l = 0.015$ ,  $\mu_n = 0.015$ ,  $\beta_{nh} = 0.75$ ,  $\beta_{hl} = 0.75$ ,  $k = 40$ ,  $b = 0.1$ ,  $\mu_m = 0.01$ ,  $\gamma_l = 0.004$ ,  $\gamma_n = 0.008$ ,  $M = k(1 - \mu_m/b)$ .

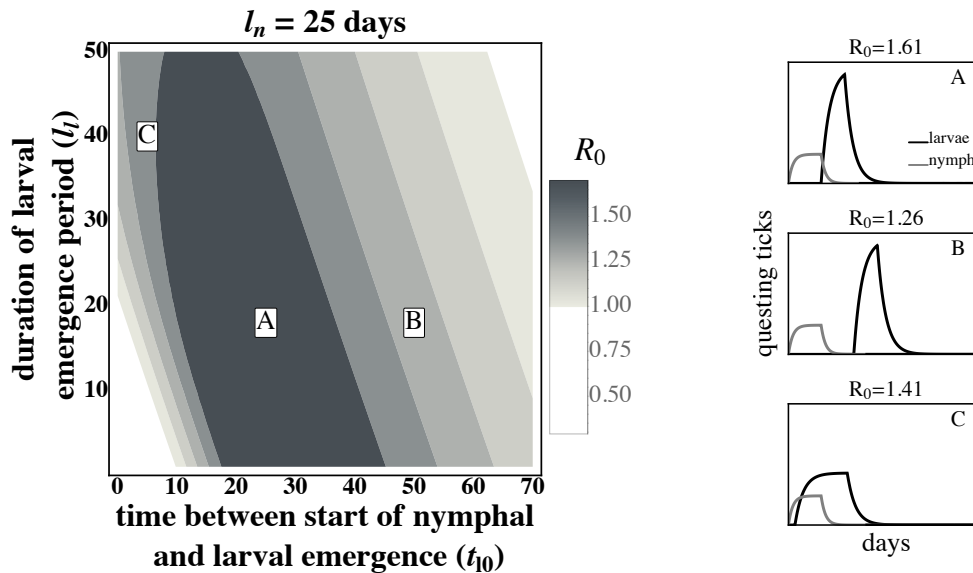

Figure 3: The basic reproductive number,  $R_0$ , of *B. burgdorferi* is greatest when larval activity is concentrated around peak mouse infection prevalence. The left-hand side panel depicts basic reproductive number as a function of the duration of larval emergence and time between nymphal and larval emergence. Panels on the right depict sample within-season dynamics for values of timing parameters indicated by their respective letters on the left hand side panel. (A) Concentrated larval emergence (small  $l_1$ ) coupled with slight emergence asynchrony ( $20 < t_{10} < 45$ ) increases the probability that questing larvae feed on mice recently infected by nymphs ( $t_{10} = 25, l_1 = 18$ ). (B) Transmission decreases as larvae emerge later ( $t_{10} > 45$ ) because the larval cohort feeds after peak mouse infection prevalence ( $t_{10} = 50, l_1 = 18$ ). (C) When larval and nymphal emergence is more synchronous (small  $t_{10}$ ), transmission to larvae increases as larval emergence duration increases (large  $l_1$ ) as more larvae feed after infectious nymphs ( $t_{10} = 5, l_1 = 40$ ). *B. burgdorferi* is not maintained in systems where  $R_0 \leq 1$ .  $R_0$  is calculated assuming tick emergence is uniformly distributed ( $U(l_1)$ ) where  $l_1$  is the larval emergence duration, see Appendix C).  $\hat{L} = \hat{L}^*$ ,  $\hat{N}_i = 1$ ,  $\hat{N}_u = \hat{N}^* - 1$  (see Appendix A.)  $l_n = 25$  days; all other parameters are the same as Fig.2.

concentrated around the mouse infection peak results in *B. burgdorferi* transmission to many larvae (Fig. 3A). In the Midwestern United States, where larvae and nymphs are synchronously active during a limited period, *B. burgdorferi* transmission is less efficient than in the Northeastern US but much greater than where both stages are more continuously active (Fig. 5). These results denote that both the duration of seasonal activity and the relative timing of activity periods impact transmission success and parasite fitness (Figs. 3, 4, 6, 5).

*B. burgdorferi* transmission efficiency is maximized when the activity periods of tick life stages are of short duration (Fig. 2). Continuous nymphal activity temporally distributes the finite number of nymph-to-mouse transmission events such that few mice become infected at any given time. Mouse infection prevalence remains continually low because mice that die, including infected mice, are replaced by uninfected juveniles at rates similar to the rate at which new infections are introduced. Mouse-to-larvae transmission events are similarly rare as most larvae feed on the relatively abundant uninfected mice. By contrast, seasonal nymphal activity concentrates nymph-to-mouse transmission events leading to many new mouse infections over a short period of time. Mouse infection prevalence increases rapidly during the nymphal activity period, as new infections occur at a much greater rate than mouse mortality, and subsequently decline when new infections stop at the end of the nymphal activity period (Fig. 2). Transmission from mice to larvae is very high if larval activity coincides with high mouse infection prevalence (Fig. 3A. and Fig. 4A.)



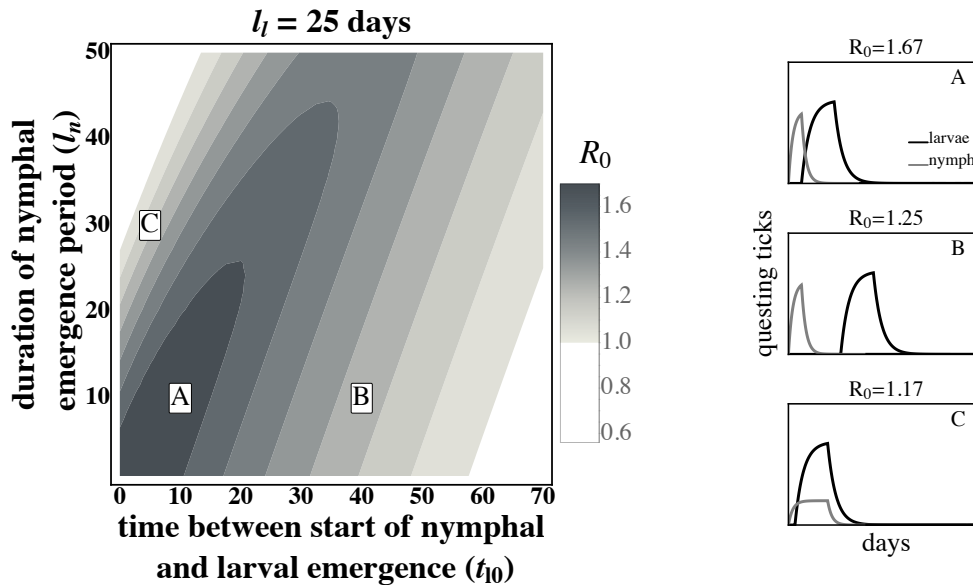

Figure 4: The basic reproductive number,  $R_0$ , of *B. burgdorferi* is greatest when larval emergence begins shortly after nymphal emergence such that larvae are active during the peak in mouse infection prevalence. As in Figure 3, the left hand panel depicts  $R_0$ , in this case as a function of the time between the start of nymphal and larval emergence, and the duration of nymphal emergence period, and the letters indicate the parameters for the within-season dynamics on the right hand panels. (A) Concentrated nymphal emergence (small  $l_n$ ) coupled with small emergence-time asynchrony between nymphs and larvae ( $t_{l0} < 10$ ) increases the probability questing larvae feed on mice recently infected by nymphs ( $t_{l0} = 10, l_n = 10$ ). (B) Longer emergence-time asynchrony ( $t_{l0} > 10$ ) results in lower mouse-to-larvae transmission rates as many mice infected by nymphs die and are replaced by mice born uninfected such that larvae are likely to feed on uninfected mice ( $t_{l0} = 40, l_n = 10$ ). (C) Synchronous emergence ( $t_{l0} = 0$ ) can also reduce transmission efficiency when nymphal emergence duration is long (large  $l_n$ ) as many larvae feed before nymphs infect mice ( $t_{l0} = 5, l_n = 30$ ).  $R_0$  is calculated assuming tick emergence is uniformly distributed ( $U(l_n)$  where  $l_n$  is nymphal emergence length, see Appendix C).  $l_l = 25, \hat{L} = \hat{L}^*, \hat{N}_i = 1, \hat{N}_u = \hat{N}^* - 1$  (see Appendix A). All other parameters are the same as Fig.2.

The seasonal activity pattern resulting in the most efficient transmission of *B. burgdorferi* occurs when larvae emerge slightly after nymphs when mouse infection prevalence is maximal (Fig. 3A.) This phenological pattern resembles the Northeastern Lyme disease system where nymphs are active in early summer and larvae in late summer, with some overlap.<sup>23</sup> Fewer mouse-to-larvae transmission events occur when ticks have synchronous emergence, as seen in the Midwest,<sup>23</sup> because some larvae feed prior to the high mouse infection prevalence period and are thus less likely to feed on an infected mouse. These results conform to intuitive expectations as well as field data<sup>23</sup> and some prior modeling efforts.<sup>33-35</sup>

In contrast to expectations, extended periods between nymphal and larval activity reduces transmission efficiency (Fig. 3B and Fig. 4B). Infection prevalence in mice decays after nymphal activity due to mouse mortality and the birth of uninfected mice. Thus, larvae feeding long after the nymphal activity period have a greater probability of feeding on uninfected mice than those that feed shortly after the nymphal activity period. While high mouse turnover is the norm in this system,<sup>36</sup> lower mouse turnover would extend the period of high mouse infection prevalence and moderate the declines in transmission efficiency caused by extended periods between larval and nymphal emergence.

The predicted transmission efficiency is greatest when all individuals in both developmental stages feed

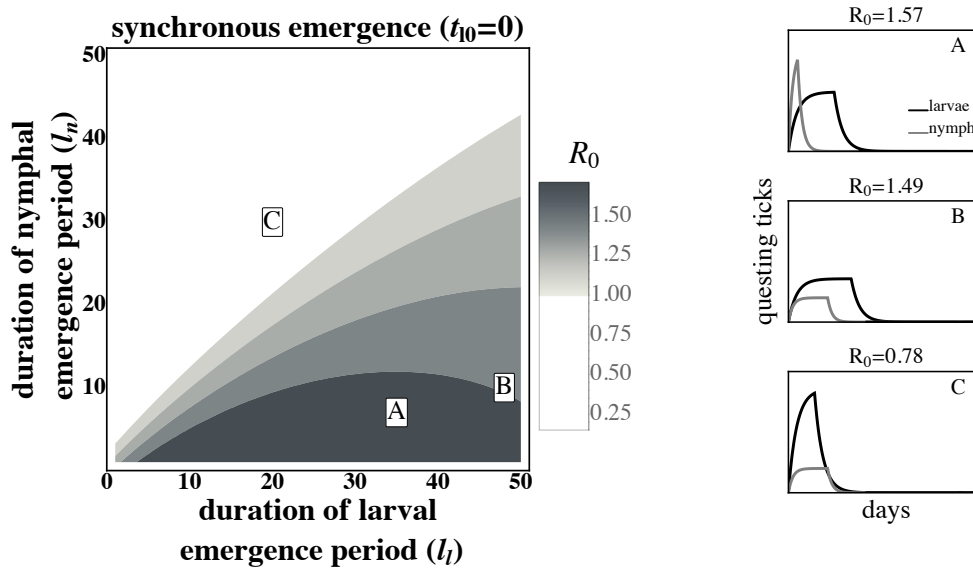

Figure 5: The larval emergence duration that maximizes  $R_0$  for *B. burgdorferi* is conditioned on nymphal emergence duration. Transmission efficiency is high if larval emergence duration is slightly longer than nymphal emergence duration ( $l_l > l_n$  in A and B), thus allowing larvae to feed on mice that were previously parasitized by nymphs. However, transmission efficiency decreases when larval emergence duration is much longer than nymphal emergence duration ( $R_0$  of B  $<$   $R_0$  of A) as late emerging larvae can feed on uninfected mice born after the nymphal activity period. Transmission from mice to larvae is low when the larval emergence duration is less than the nymphal emergence duration ( $l_l < l_n$  in C) because more larvae feed before infectious nymphs. *B. burgdorferi* is not maintained in systems where  $R_0 \leq 1$ .  $R_0$  is calculated assuming tick emergence is uniformly distributed ( $U(l_l)$  where  $l_l$  is the larval emergence length. See Appendix C for details).  $\hat{L} = \hat{L}^*$ ,  $\hat{N}^* = \hat{N}_u - 1$  (see Appendix A).  $t_{10} = 0$ , (A)  $l_l = 35, l_n = 7$  (B)  $l_l = 20, l_n = 30$  (C)  $l_l = 48, l_n = 10$ .  $t_{10} = 0$  days; all other parameters are the same as Fig.2.

simultaneously and when larvae feed immediately after nymphs. This result relies on the assumption that there is no limit to the number of ticks that can feed on a mouse at any given time. Realistically, the number of ticks per mouse is limited by grooming and foraging behaviors. Incorporating a maximum number of ticks per mouse will alter the prediction that simultaneous emergence within life stages maximizes transmission efficiency as most ticks will fail to find an available host, resulting in fewer fed ticks each year and thus a lower  $R_0$ . Given this more realistic ecological scenario, an intermediately concentrated emergence pattern will result in more infected larvae.

Our results reveal that slight alterations in host emergence timing can have significant impacts on parasite fitness. This raises the question of whether parasites evolve to manipulate host phenology as observed in the *e.g. Microbotryum violaceum* system where infection causes advances in *Silene alba* flowering time in order to improve transmission opportunities.<sup>37</sup> Manipulation of tick phenology by *B. burgdorferi* has not yet been studied, however it has been suggested that the behavioral changes that have been observed in ticks infected with *B. burgdorferi* increase transmission, but not necessarily tick fitness.<sup>38</sup> Future field experiments could address this question by investigating phenological differences between infected and uninfected nymphs.

As all disease systems exhibit seasonality, phenological drivers may have large impacts on the transmission success, and disease risk from, many parasites. Geographic variation in host or vector phenology may also be an important driver of documented variations in pathogen prevalence and disease risk.<sup>39,40</sup>

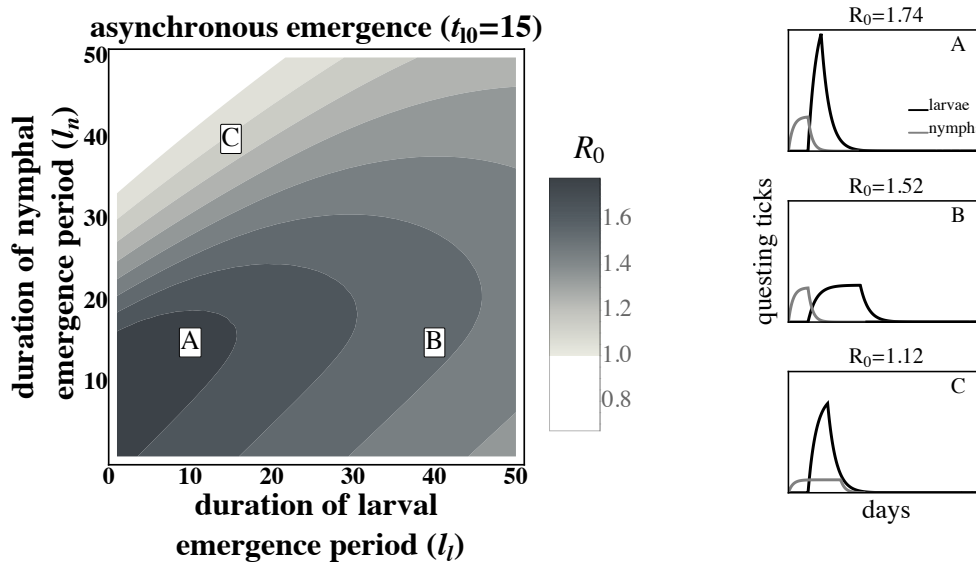

Figure 6: Highly concentrated larval emergence increases  $R_0$  when tick emergence is asynchronous. (A) Concentrated nymphal emergence drives high mouse infection prevalence and results in high transmission to larvae when larval emergence is tightly concentrated ( $l_l = 10, l_n = 15$ ). (B) Transmission from mice to larvae decreases as larval emergence duration increases because larvae are more likely to feed on uninfected mice born after nymphal activity ( $l_l = 40, l_n = 15$ ). (C) Transmission from mice to larvae also decreases if larval emergence duration is highly concentrated and nymphal emergence duration is broad because many larvae feed before nymphs infect mice ( $l_l = 15, l_n = 40$ ).  $R_0$  is calculated assuming tick emergence is  $U(l_l)$  where  $l_l$  is the larval emergence length (see Appendix C.)  $\hat{L} = \hat{L}^*, \hat{N}_i = 1, \hat{N}_u = \hat{N}^* - 1$  (see Appendix A.)  $t_{10} = 15$  days; all other parameters are the same as Fig.2.

Public health predictions of disease risk may be improved by accounting for phenological variation. Further, the dramatic shifts in host and vector phenology driven by global climate change<sup>41–44</sup> may result in equally dramatic shifts in transmission efficiency and pathogen prevalence at regional or global scales.

## References

- <sup>1</sup> Abraham J Miller-Rushing, Toke Thomas Høye, David W Inouye, and Eric Post. The effects of phenological mismatches on demography. Philosophical Transactions of the Royal Society B: Biological Sciences, 365(1555):3177–3186, 2010.
- <sup>2</sup> Sharon Bewick, R Stephen Cantrell, Chris Cosner, and William F Fagan. How Resource Phenology Affects Consumer Population Dynamics. The American Naturalist, 187(2):151–166, February 2016.
- <sup>3</sup> Sara H Paull and Pieter TJ Johnson. Experimental warming drives a seasonal shift in the timing of host-parasite dynamics with consequences for disease risk. Ecology letters, 17(4):445–453, 2014.
- <sup>4</sup> Iain Barber, Boris W Berkhout, and Zalina Ismail. Thermal change and the dynamics of multi-host parasite life cycles in aquatic ecosystems. Integrative and comparative biology, 56(4):561–572, 2016.
- <sup>5</sup> Nathan D Burkett-Cadena, Christopher JW McClure, Russell A Ligon, Sean P Graham, Craig Guyer, Geoffrey E Hill, Stephen S Ditchkoff, Micky D Eubanks, Hassan K Hassan, and Thomas R Unnasch. Host reproductive phenology drives seasonal patterns of host use in mosquitoes. PLoS One, 6(3):e17681, 2011.
- <sup>6</sup> Elsa E Cleland, Isabelle Chuine, Annette Menzel, Harold A Mooney, and Mark D Schwartz. Shifting plant phenology in response to global change. Trends in Ecology & Evolution, 22(7):357–365, July 2007.
- <sup>7</sup> KUDO Gaku, Yoko Nishikawa, Tetsuya Kasagi, and Shoji Kosuge. Does seed production of spring ephemerals decrease when spring comes early? Ecological research, 19(2):255–259, 2004.
- <sup>8</sup> David W Inouye. Effects of climate change on phenology, frost damage, and floral abundance of montane wildflowers. Ecology, 89(2):353–362, 2008.
- <sup>9</sup> Gaku Kudo and Takashi Y Ida. Early onset of spring increases the phenological mismatch between plants and pollinators. Ecology, 94(10):2311–2320, 2013.
- <sup>10</sup> Jane Memmott, Paul G Craze, Nickolas M Waser, and Mary V Price. Global warming and the disruption of plant–pollinator interactions. Ecology letters, 10(8):710–717, 2007.
- <sup>11</sup> Stein Joar Hegland, Anders Nielsen, Amparo Lázaro, Anne-Line Bjerknæs, and Ørjan Totland. How does climate warming affect plant-pollinator interactions? Ecology letters, 12(2):184–195, 2009.
- <sup>12</sup> Abigail E Cahill, Matthew E Aiello-Lammens, M Caitlin Fisher-Reid, Xia Hua, Caitlin J Karanewsky, Hae Yeong Ryu, Gena C Sbeglia, Fabrizio Spagnolo, John B Waldron, Omar Warsi, et al. How does climate change cause extinction? Proceedings of the Royal Society B: Biological Sciences, 280(1750):20121890, 2013.
- <sup>13</sup> Derek M Johnson, Ulf Büntgen, David C Frank, Kyrre Kausrud, Kyle J Haynes, Andrew M Liebhold, Jan Esper, and Nils Chr Stenseth. Climatic warming disrupts recurrent alpine insect outbreaks. Proceedings of the National Academy of Sciences, 107(47):20576–20581, 2010.
- <sup>14</sup> Jan O Washburn and Howard V Cornell. Parasitoids, patches, and phenology: their possible role in the local extinction of a cynipid gall wasp population. Ecology, 62(6):1597–1607, 1981.
- <sup>15</sup> James A Powell and Barbara J Bentz. Connecting phenological predictions with population growth rates for mountain pine beetle, an outbreak insect. Landscape Ecology, 24(5):657–672, 2009.

REFERENCES

13

- <sup>16</sup> Jane U Jepsen, Snorre B Hagen, Stein-Rune Karlsen, and Rolf A Ims. Phase-dependent outbreak dynamics of geometrid moth linked to host plant phenology. Proceedings of the Royal Society B: Biological Sciences, 276(1676):4119–4128, 2009.
- <sup>17</sup> Margriet van Asch and Marcel E Visser. Phenology of forest caterpillars and their host trees: the importance of synchrony. Annu. Rev. Entomol., 52:37–55, 2007.
- <sup>18</sup> Jane U Jepsen, Snorre B Hagen, Rolf A Ims, and Nigel G Yoccoz. Climate change and outbreaks of the geometrids operophtera brumata and epirrita autumnata in subarctic birch forest: evidence of a recent outbreak range expansion. Journal of Animal Ecology, 77(2):257–264, 2008.
- <sup>19</sup> A S Clarke. Studies on the life cycle of the pseudophyllidean cestode Schistocephalus solidus. Proceedings of the Zoological Society of London, 124(2):257–302, August 1954.
- <sup>20</sup> D C Heins, D M Eidam, and J A Baker. Timing of Infections in the Threespine Stickleback (*Gasterosteus aculeatus*) by *Schistocephalus solidus* in Alaska. The Journal of parasitology, 102(2):286–289, April 2016.
- <sup>21</sup> S E Randolph. Tick ecology: processes and patterns behind the epidemiological risk posed by ixodid ticks as vectors. Parasitology, 129(7):S37–S65, 1999.
- <sup>22</sup> S E Randolph, R M Green, M F Peacey, and D J Rogers. Seasonal synchrony: the key to tick-borne encephalitis foci identified by satellite data. Parasitology, 121 ( Pt 1):15–23, July 2000.
- <sup>23</sup> Klaus Kurtenbach, Klára Hanincová, Jean I Tsao, Gabriele Margos, Durland Fish, and Nicholas H Ogden. Fundamental processes in the evolutionary ecology of Lyme borreliosis. Nature reviews. Microbiology, 4(9):660–669, September 2006.
- <sup>24</sup> Lance A Durden, James H Oliver, Craig W Banks, and Gregory N Vogel. Parasitism of lizards by immature stages of the blacklegged tick, *Ixodes scapularis* (acari, ixodidae). Experimental & applied acarology, 26(3-4):257–266, 2002.
- <sup>25</sup> R Jory Brinkerhoff, Corrine M Folsom-O’Keefe, Henry M Streby, Stephen J Bent, Kimberly Tsao, and Maria A Diuk-Wasser. Regional variation in immature *Ixodes scapularis* parasitism on north american songbirds: implications for transmission of the lyme pathogen, *Borrelia burgdorferi*. Journal of medical entomology, 48(2):422–428, 2011.
- <sup>26</sup> Kathleen LoGiudice, Richard S Ostfeld, Kenneth A Schmidt, and Felicia Keesing. The ecology of infectious disease: effects of host diversity and community composition on Lyme disease risk. Proceedings of the National Academy of Sciences, 100(2):567–571, January 2003.
- <sup>27</sup> L A Magnarelli, J F Anderson, and D Fish. Transovarial transmission of *Borrelia burgdorferi* in *Ixodes dammini* (Acari:Ixodidae). The Journal of Infectious Diseases, 156(1):234–236, July 1987.
- <sup>28</sup> Justin D Radolf, Melissa J Caimano, Brian Stevenson, and Linden T Hu. Of ticks, mice and men: understanding the dual-host lifestyle of Lyme disease spirochaetes. Nature reviews. Microbiology, 10(2):87–99, January 2012.
- <sup>29</sup> H McCallum. How should pathogen transmission be modelled? Trends in Ecology & Evolution, 16(6):295–300, June 2001.

REFERENCES

14

- <sup>30</sup> Moshe B Hoshen and Andrew P Morse. A weather-driven model of malaria transmission. Malaria journal, 3(1):32, 2004.
- <sup>31</sup> Catherine Gremillion-Smith and Alan Woolf. Epizootiology of skunk rabies in north america. Journal of wildlife diseases, 24(4):620–626, 1988.
- <sup>32</sup> Roy M Anderson. Population dynamics of the cestode *caryophyllaeus laticeps* (pallas, 1781) in the bream (*abramis brama l.*). The Journal of Animal Ecology, pages 305–321, 1974.
- <sup>33</sup> N H Ogden, M Bigras-Poulin, C J O’Callaghan, I K Barker, L R Lindsay, A Maarouf, K E Smoyer-Tomic, D Waltner-Toews, and D Charron. A dynamic population model to investigate effects of climate on geographic range and seasonality of the tick *Ixodes scapularis*. International Journal for Parasitology, 35(4):375–389, April 2005.
- <sup>34</sup> N H Ogden, M Bigras-Poulin, K Hanincová, A Maarouf, C J O’Callaghan, and K Kurtenbach. Projected effects of climate change on tick phenology and fitness of pathogens transmitted by the North American tick *Ixodes scapularis*. Journal of Theoretical Biology, 254(3):621–632, October 2008.
- <sup>35</sup> J M Dunn, S Davis, A Stacey, and M A Diuk-Wasser. A simple model for the establishment of tick-borne pathogens of *Ixodes scapularis* A global sensitivity analysis of R0. Journal of Theoretical Biology, 335(C):213–221, October 2013.
- <sup>36</sup> Malcolm D Schug, Stephen H Vessey, and Andrew I Korytko. Longevity and Survival in a Population of White-Footed Mice (*Peromyscus leucopus*) . American Society of Mammologists, 72(2):360–366, May 1991.
- <sup>37</sup> Helen Miller Alexander. An experimental field study of anther-smut disease of *Silene alba* caused by *Ustilago violacea*: genotypic variation and disease incidence . Evolution, 43(4):835–847, July 1989.
- <sup>38</sup> H Lefcort and L A Durden. The effect of infection with Lyme disease spirochetes (*Borrelia burgdorferi*) on the phototaxis, activity, and questing height of the tick vector *Ixodes scapularis*. Parasitology, 113:97–103, March 1996.
- <sup>39</sup> Sonia Altizer, Andrew Dobson, Parvize Hosseini, Peter Hudson, Mercedes Pascual, and Pejman Rohani. Seasonality and the dynamics of infectious diseases. Ecology Letters, 9(4):467–484, March 2006.
- <sup>40</sup> Micaela Elvira Martinez. The calendar of epidemics: Seasonal cycles of infectious diseases. PLOS Pathogens, 14(11):e1007327–15, November 2018.
- <sup>41</sup> J Penuelas. Phenology: Responses to a Warming World. Science, 294(5543):793–795, October 2001.
- <sup>42</sup> Leo Meyer, Sander Brinkman, Line van Kesteren, Noëmie Leprince-Ringuet, and Fijke van Boxmeer. IPCC, 2014: Climate Change 2014: Synthesis Report. Contribution of Working Groups I, II and III to the Fifth Assessment Report of the Intergovernmental Panel on Climate Change. Technical report, Geneva, Switzerland, 2014.
- <sup>43</sup> E Post, M C Forchhammer, N C Stenseth, and T V Callaghan. The timing of life-history events in a changing climate. Proceedings of the Royal Society B: Biological Sciences, 268(1462):15–23, January 2001.
- <sup>44</sup> Jacob Johansson, Jan-Åke Nilsson, and Niclas Jonzén. Phenological change and ecological interactions: an introduction. Oikos, 124(1):1–3, December 2014.

## A Appendix A

The following differential equations describe within-season tick population dynamics, valid from  $(0, \tau)$  where  $\tau$  is the length of the tick feeding season. The density dependent mouse birth rate,  $b(M)$  is equal to  $b(1 - M/k)$  where  $M = M_u + M_i$ ,  $b$  is the mouse birth rate and  $k$  is the mouse carrying capacity. The mouse population is assumed to be constant so that  $M = k(1 - \frac{\mu_m}{b})$ . All other parameters are the same as described in the main text.

$$\frac{dL_q}{dt} = \hat{L}(T)g_l(t, \theta_l) - L_q(\gamma_l M + \mu_l), \quad (\text{A.1a})$$

$$\frac{dL_f}{dt} = \gamma_l L_q M, \quad (\text{A.1b})$$

$$\frac{dN_q}{dt} = \hat{N}(T)g_n(t, \theta_n) - N_q(\gamma_n M + \mu_n), \quad (\text{A.1c})$$

$$\frac{dN_f}{dt} = \gamma_n N_q M. \quad (\text{A.1d})$$

(A.1a-d) is solved analytically by describing tick emergence using a uniform distribution,  $U(l_i)$

$$g_i(t) = \begin{cases} 0 & t < t_{i0} \\ \frac{1}{l_i} & t_{i0} \leq t \leq t_{if} \\ 0 & t_{if} < \tau \end{cases}$$

Within-season dynamics are coupled to recurrence equations that describe nymphal and larval survival between years. The total fed larval population at the end of the year,  $L_f(\tau)$  gives rise to the population of nymphs  $\hat{N}$  that will emerge the following year, described by the map

$$\hat{N}(T+1) = \sigma_l(L_f(\tau)) \quad (\text{A.2})$$

where

$$L_f(\tau) = \frac{\gamma_l \hat{L}(T)M}{l_l(\gamma_l M + \mu_l)} \left( \int_{t_{i0}}^{t_{if}} 1 - e^{-(\gamma_l M + \mu_l)t} dt + (1 - e^{-(\gamma_l M + \mu_l)l_i}) \int_0^{\tau - t_{if}} e^{-(\gamma_l M + \mu_l)t} dt \right)$$

Survival of fed larvae to questing nymphs is described by the function:  $\sigma_l(L_f(\tau)) = \frac{L_f(\tau)}{1 + \alpha L_f(\tau)}$  to account for density dependent larval moulting probability.

Similarly, the total fed nymphal population at the end of the year,  $N_f(\tau)$ , gives rise to the population of larvae  $\hat{L}$  that will emerge the following year, described by the map

$$\hat{L}(T+1) = \sigma_n N_f(\tau) \quad (\text{A.3})$$

where

$$N_f(\tau) = \frac{\sigma_n \gamma_n \hat{N}(T)M}{l_n(\gamma_n M + \mu_n)} \left( \int_0^{t_{nf}} 1 - e^{-(\gamma_n M + \mu_n)t} dt + (1 - e^{-(\gamma_n M + \mu_n)l_n}) \int_0^{\tau - t_{nf}} e^{-(\gamma_n M + \mu_n)t} dt \right)$$

$\sigma_n$  is the expected number of eggs produced per nymph that feeds to repletion after accounting for survival through adulthood and adult fecundity.

If we define

$$\phi_l = \frac{\gamma_l M}{l_l(\gamma_l M + \mu_l)} \left( \int_{t_{l0}}^{t_{lf}} 1 - e^{-(\gamma_l M + \mu_l)t} dt + (1 - e^{-(\gamma_l M + \mu_l)t_{l0}}) \int_0^{\tau - t_{lf}} e^{-(\gamma_l M + \mu_l)t} dt \right),$$

$$\phi_n = \frac{\sigma_n \gamma_n M}{l_n(\gamma_n M + \mu_n)} \left( \int_0^{t_{nf}} 1 - e^{-(\gamma_n M + \mu_n)t} dt + (1 - e^{-(\gamma_n M + \mu_n)t_{nf}}) \int_0^{\tau - t_{nf}} e^{-(\gamma_n M + \mu_n)t} dt \right)$$

The maps for  $\hat{L}(T+1)$  and  $\hat{N}(T+1)$  can be written as

$$\hat{L}(T+1) = \sigma_n \phi_n \hat{N}(T),$$

$$\hat{N}(T+1) = \frac{\phi_l \hat{L}(T)}{1 + \alpha \phi_l \hat{L}(T)}$$

The equilibrium population size  $\hat{L}^*$  is then

$$\hat{L}(T+2) = \sigma_n \phi_n \hat{N}(T+1)$$

$$\hat{L}(T+2) = \frac{\sigma_n \phi_n \phi_l \hat{L}(T)}{1 + \alpha \phi_l \hat{L}(T)}$$

$$\hat{L}^* = \frac{\sigma_n \phi_n \phi_l \hat{L}^*}{1 + \alpha \phi_l \hat{L}^*}$$

$$\hat{L}^* = \frac{\sigma_n \phi_n \phi_l - 1}{\alpha \phi_l}$$

Similarly for  $\hat{N}^*$

$$\hat{N}(T+2) = \frac{\phi_l \hat{L}(T+1)}{1 + \alpha \phi_l \hat{L}(T+1)}$$

$$\hat{N}(T+2) = \frac{\phi_l \sigma_n \phi_n \hat{N}(T)}{1 + \alpha \phi_l \sigma_n \phi_n \hat{N}(T)}$$

$$\hat{N}^* = \frac{\phi_l \sigma_n \phi_n \hat{N}^*}{1 + \alpha \phi_l \sigma_n \phi_n \hat{N}^*}$$

$$\hat{N}^* = \frac{\sigma_n \phi_n \phi_l - 1}{\alpha \phi_l \phi_n}$$

The stability of these equilibrium points are found by considering the biennial maps of the tick life cycle



$$\begin{aligned}\frac{d\hat{L}(T+2)}{d\hat{L}(T)} &= \frac{\sigma_n \phi_n \phi_l}{1 + \alpha \phi_l \hat{L}^*} \\ \frac{d\hat{L}(T+2)}{d\hat{L}(T)} &= \frac{\sigma_n \phi_n \phi_l}{1 + \alpha \phi_l \frac{\sigma_n \phi_n \phi_l - 1}{\alpha \phi_l}} \\ \frac{d\hat{L}(T+2)}{d\hat{L}(T)} &= 1 \\ \frac{d\hat{N}(T+2)}{d\hat{N}(T)} &= \frac{\phi_l \sigma_n \phi_n}{1 + \alpha \phi_l \sigma_n \phi_n \hat{N}^*} \\ \frac{d\hat{N}(T+2)}{d\hat{N}(T)} &= \frac{\phi_l \sigma_n \phi_n}{1 + \alpha \phi_l \phi_n \frac{\sigma_n \phi_n \phi_l - 1}{\alpha \phi_l \phi_n}} \\ \frac{d\hat{N}(T+2)}{d\hat{N}(T)} &= 1\end{aligned}$$

This system is marginally stable.

## B Appendix B

Equations (1a-1g) reduce to the following set of equations if we assume that the host population is at equilibrium, ( $M = k(1 - \frac{\mu_m}{b})$ ):

$$\frac{dL_q}{dt} = \hat{L}(T)g_l(t, \theta_l) - L_q(\gamma_l M + \mu_l), \quad (\text{B.1a})$$

$$\frac{dL_{if}}{dt} = \beta_{ml}\gamma_l L_q M_i - \mu_f L_q, \quad (\text{B.1b})$$

$$\frac{dL_{uf}}{dt} = \gamma_l L_q (M - \beta_{ml} M_i) - \mu_f L_q, \quad (\text{B.1c})$$

$$\frac{dN_{iq}}{dt} = \hat{N}_i(T)g_n(t, \theta_n) - N_{iq}(\gamma_n M + \mu_n), \quad (\text{B.1d})$$

$$\frac{dN_{uq}}{dt} = \hat{N}_u(T)g_n(t, \theta_n) - N_{uq}(\gamma_n M + \mu_n), \quad (\text{B.1e})$$

$$\frac{dN_f}{dt} = \gamma_n (N_{iq} + N_{uq}) - \mu_f N_f, \quad (\text{B.1f})$$

$$\frac{dM_i}{dt} = \beta_{nm}\gamma_n N_{iq} (M - M_i) - \mu_m M_i. \quad (\text{B.1g})$$

(B.1a-g) is solved analytically by describing tick emergence using a uniform distribution,  $U(l_i)$

$$g_i(t) = \begin{cases} 0 & t < t_{i0} \\ \frac{1}{l_i} & t_{i0} \leq t \leq t_{if} \\ 0 & t_{if} < \tau \end{cases}$$

where  $i = l, n$ ,  $t_{i0}$  denotes the start of emergence,  $l_i$  denotes the length of emergence and  $t_{if}$  denotes the end of emergence ( $t_{i0} + l_i = t_{if}$ ). The season begins with the emergence of the nymphs ( $t_{n0} = 0$ ). Larval emergence,  $t_{l0}$  can begin concurrently with nymphal emergence ( $t_{l0} = 0$ ) or have a start time that is offset relative to nymphs ( $t_{l0} > 0$ ). The within-season dynamics have the following time-dependent solutions:

$$L_q(t) = \begin{cases} 0 & t < t_{l0} \\ \frac{\hat{L}(T)}{l_l(\gamma_l M + \mu_l)} (1 - e^{-(\gamma_l M + \mu_l)t}) & t_{l0} \leq t \leq t_{lf} \\ L_q(t_{lf}) e^{-(\gamma_l M + \mu_l)t} & t_{lf} < \tau \end{cases} \quad (\text{B.2a})$$

$$L_{if}(t) = \begin{cases} 0 & t < t_{l0} \\ \frac{\gamma_l \beta_{ml} \hat{L}(T)}{l_l(\gamma_l M + \mu_l)} \left( \int_{t_{l0}}^{t_{lf}} 1 - e^{-(\gamma_l M + \mu_l)t} \int_0^t M_i(s + t_{l0}) ds dt \right) & t_{l0} \leq t \leq t_{lf} \\ \gamma_l \beta_{ml} L_{if}(t_{lf}) \int_0^{T-t_{lf}} e^{-(\gamma_l M + \mu_l)t} \int_0^t M_i(s + t_{lf}) ds dt & t_{lf} < \tau \end{cases} \quad (\text{B.2b})$$

$$L_{uf}(t) = \begin{cases} 0 & t < t_{l0} \\ \frac{\gamma_l L(\hat{T})}{l_l(\gamma_l M + \mu_l)} \left( \int_{t_{l0}}^{t_{lf}} 1 - e^{-(\gamma_l M + \mu_l)t} \int_0^t (M - \beta_{ml} M_i(s + t_{l0})) ds dt \right) & t_{l0} \leq t \leq t_{lf} \\ \gamma_l L_{uf}(t_{lf}) \int_0^{T-t_{lf}} e^{-(\gamma_l M + \mu_l)t} \int_0^t (M - \beta_{ml} M_i(s + t_{lf})) ds dt & t_{lf} < \tau \end{cases} \quad (\text{B.2c})$$

$$N_{iq}(t) = \begin{cases} \frac{\hat{N}_i(T)}{l_n(\gamma_n M + \mu_n)} (1 - e^{-(\gamma_n M + \mu_n)t}) & 0 \leq t \leq t_{nf} \\ N_{iq}(t_{nf}) e^{-(\gamma_n M + \mu_n)t} & t_{nf} < \tau \end{cases} \quad (\text{B.2d})$$

$$N_{uq}(t) = \begin{cases} \frac{\hat{N}_u(T)}{l_n(\gamma_n M + \mu_n)} (1 - e^{-(\gamma_n M + \mu_n)t}) & 0 \leq t \leq t_{nf} \\ N_{uq}(t_{nf}) e^{-(\gamma_n M + \mu_n)t} & t_{nf} < \tau \end{cases} \quad (\text{B.2e})$$

$$N_f(t) = \begin{cases} \frac{\gamma_n M (\hat{N}_i(T) + \hat{N}_u(T))}{l_n(\gamma_n M + \mu_n)} \int_0^{t_{nf}} (1 - e^{-(\gamma_n M + \mu_n)t}) dt & 0 \leq t \leq t_{nf} \\ N_f(t_{nf}) \int_0^{T-t_{nf}} e^{-(\gamma_n M + \mu_n)t} dt & t_{nf} < t < \tau \end{cases} \quad (\text{B.2f})$$

$$M_i(t) = \begin{cases} \frac{\gamma_n \beta_{nm} \hat{N}_i(T) M}{l_n(\gamma_n M + \mu_n)} M_{i1}(t, \hat{N}_i(T)) & 0 \leq t \leq t_{nf} \\ \frac{\gamma_n \beta_{nm} \hat{N}_i(T) M}{l_n(\gamma_n M + \mu_n)} M_{i2}(t, \hat{N}_i(T)) & t_{nf} < t < \tau \end{cases} \quad (\text{B.2g})$$

(B.2g) depends on the activity of questing nymphs and is split by whether nymphs are emerging (new nymphs entering system),  $M_{i1}(t)$  for  $0 \leq t \leq t_{nf}$  or have finished emerging (no more new nymphs entering system),  $M_{i2}(t)$  for  $t_{nf} < t < \tau$ .

$$M_{i1}(t, \hat{N}_i(T)) = e^{-\mu_n t - \frac{e^{-(\gamma_n M + \mu_n)M} \gamma_n \beta_{nm} \hat{N}_i(T) (1 + e^{-(\gamma_n M + \mu_n)t} (\gamma_n M + \mu_n)t)}{l_n(\gamma_n M + \mu_n)^2}}$$

$$\int_0^t -e^{-\frac{e^{-(\gamma_n M + \mu_n)\gamma_n \beta_{nm} \hat{N}_i(T) + (\gamma_n M + \mu_n)(\gamma_n \beta_{nm} \hat{N}_i(T) + l_n \mu_m (\gamma_n M + \mu_n))s}}{l_n(\gamma_n M + \mu_n)^2}} (-1 + e^{-(\gamma_n M + \mu_n)s}) ds$$

$$M_{i2}(t, \hat{N}_i(T)) = e^{-\mu_n t + \frac{e^{-(\gamma_n M + \mu_n)t} \gamma_n \beta_{nm} N_{iq}(t_{nf})}{\gamma_n M + \mu_n}} \left( e^{-\frac{\gamma_n \beta_{nm} N_{iq}(t_{nf})}{\gamma_n M + \mu_n}} M_{i1}(t_{nf}, \hat{N}_i(T)) + \right.$$

$$\left. \gamma_n \beta_{nm} N_{iq}(t_{nf}) M \int_0^t e^{-\frac{e^{-(\gamma_n M + \mu_n)s} \gamma_n \beta_{nm} N_{iq}(t_{nf}) - (\gamma_n M - \mu_m + \mu_n)s}{\gamma_n M + \mu_n}} \right)$$

The total number of fed infected larvae by the end of the season,  $L_{if}(\tau)$ , fed uninfected larvae by the end of

the season,  $L_{uf}(\tau)$  and total fed larvae by the end of the season  $L_f(\tau)$  are given by

$$\begin{aligned} L_{if}(\tau) &= \frac{\gamma l \beta_{ml} \hat{L}(T)}{l_l(\gamma l M + \mu_l)} \left( \int_{t_{l0}}^{t_{lf}} 1 - e^{-(\gamma l M + \mu_l)t} \int_0^t M_i(s + t_{l0}) ds dt + \right. \\ &\quad \left. (1 - e^{-(\gamma l M + \mu_l)l_l}) \int_0^{\tau - t_{lf}} e^{-(\gamma l M + \mu_l)t} \int_0^t M_i(s + t_{lf}) ds dt \right) \\ L_{uf}(\tau) &= \frac{\gamma l \hat{L}(T)}{l_l(\gamma l M + \mu_l)} \left( \int_{t_{l0}}^{t_{lf}} 1 - e^{-(\gamma l M + \mu_l)t} \int_0^t 1 - \beta_{ml} M_i(s + t_{l0}) ds dt + \right. \\ &\quad \left. (1 - e^{-(\gamma l M + \mu_l)l_l}) \int_0^{\tau - t_{lf}} e^{-(\gamma l M + \mu_l)t} \int_0^t 1 - \beta_{ml} M_i(s + t_{lf}) ds dt \right) \\ L_f(\tau) &= \frac{\gamma l \hat{L}(T) M}{l_l(\gamma l M + \mu_l)} \left( \int_{t_{l0}}^{t_{lf}} 1 - e^{-(\gamma l M + \mu_l)t} dt + (1 - e^{-(\gamma l M + \mu_l)l_l}) \int_0^{\tau - t_{lf}} e^{-(\gamma l M + \mu_l)t} dt \right) \end{aligned}$$

Note that both  $L_{if}(\tau)$  and  $L_{uf}(\tau)$  are dependent on  $\hat{N}_i$  through the transmission dynamics of  $M_i(t)$ . The total number of fed nymphs by the end of the season is given by

$$N_f(\tau) = \frac{\sigma_n \gamma_n (\hat{N}_i(T) + \hat{N}_u(T)) M}{l_n(\gamma_n M + \mu_n)} \left( \int_0^{t_{nf}} 1 - e^{-(\gamma_n M + \mu_n)t} dt + (1 - e^{-(\gamma_n M + \mu_n)l_n}) \int_0^{\tau - t_{nf}} e^{-(\gamma_n M + \mu_n)t} dt \right)$$

We can also write  $L_{if}(\tau)$ ,  $L_{uf}(\tau)$  and  $N_f(\tau)$  in terms of the total number of emerging ticks for a given season,  $\hat{L}(T)$ ,  $\hat{N}_i(T)$ , and  $\hat{N}_u(T)$ .

$$\begin{aligned} L_{if}(\tau) &= \phi_{li}(\hat{N}_i(T)) \hat{L}(T), \\ L_{uf}(\tau) &= \phi_{lu}(\hat{N}_u(T)) \hat{L}(T), \\ N_f(\tau) &= \phi_n \hat{N}(T). \end{aligned}$$

Where  $\phi_n$  denotes the fraction of emerging nymphs that feed over a growing season as calculated from within-season dynamics (e.g.,  $\phi_n = \frac{N_f(\tau)}{\hat{N}(T)}$ ), and  $\phi_{li}(\hat{N}_i(T))$  and  $\phi_{lu}(\hat{N}_i(T))$  are functions of  $\hat{N}_i(T)$  that denote the fraction of emerging larvae that become infected or remain uninfected through feeding as calculated from within-season dynamics.

$$\begin{aligned} \phi_{li}(\hat{N}_i(T)) &= \frac{\gamma l \beta_{ml}}{l_l(\gamma l M + \mu_l)} \left( \int_{t_{l0}}^{t_{lf}} 1 - e^{-(\gamma l M + \mu_l)t} \int_0^t M_i(s + t_{l0}, \hat{N}_i(T)) ds dt + \right. \\ &\quad \left. (1 - e^{-(\gamma l M + \mu_l)l_l}) \int_0^{\tau - t_{lf}} e^{-(\gamma l M + \mu_l)t} \int_0^t M_i(s + t_{lf}, \hat{N}_i(T)) ds dt \right), \\ \phi_{lu}(\hat{N}_i(T)) &= \frac{\gamma l}{l_l(\gamma l M + \mu_l)} \left( \int_{t_{l0}}^{t_{lf}} 1 - e^{-(\gamma l M + \mu_l)t} \int_0^t 1 - \beta_{ml} M_i(s + t_{l0}, \hat{N}_i(T)) ds dt + \right. \\ &\quad \left. (1 - e^{-(\gamma l M + \mu_l)l_l}) \int_0^{\tau - t_{lf}} e^{-(\gamma l M + \mu_l)t} \int_0^t 1 - \beta_{ml} M_i(s + t_{lf}, \hat{N}_i(T)) ds dt \right), \\ \phi_n &= \frac{\sigma_n \gamma_n M}{l_n(\gamma_n M + \mu_n)} \left( \int_0^{t_{nf}} 1 - e^{-(\gamma_n M + \mu_n)t} dt + (1 - e^{-(\gamma_n M + \mu_n)l_n}) \int_0^{\tau - t_{nf}} e^{-(\gamma_n M + \mu_n)t} dt \right). \end{aligned}$$

Discrete annual maps of each population can then be written as

$$\hat{L}(T+1) = \sigma_n \phi_n \hat{N}(T), \quad (\text{B.3})$$

$$\hat{N}_i(T+1) = \sigma_{li}(\phi_{li}(\hat{N}_i(T)))\hat{L}(T), \phi_l \hat{L}(T), \quad (\text{B.4})$$

$$\hat{N}_u(T+1) = \sigma_{lu}(\phi_{lu}(\hat{N}_i(T)))\hat{L}(T), \phi_l \hat{L}(T) \quad (\text{B.5})$$

To check the stability of tick populations, consider the biennial maps

$$\hat{L}(T+2) = \sigma_n \phi_n \sigma_l \phi_l \hat{L},$$

$$\hat{N}_i(T+2) = \sigma_{li}(\phi_{li}(\hat{N}_i(T+1)))\sigma_n \phi_n \hat{N}(T), \sigma_n \phi_n \hat{N}(T),$$

$$\hat{N}_u(T+2) = \sigma_{lu}(\phi_{lu}(\hat{N}_i(T+1)))\sigma_n \phi_n \hat{N}(T), \sigma_n \phi_n \hat{N}(T)$$

Infection status does not impact demographic rates. The larval equilibrium size  $\hat{L}^*$  and total nymphal equilibrium size  $\hat{N}^*$  in the infection subsystem are identical to the result found above in Appendix A that ignores infection. As  $\hat{N}_i^* + \hat{N}_u^* = \hat{N}^*$ ,  $\hat{N}_i^*$  and  $\hat{N}_u^*$  are both marginally stable.  $\phi_{li}$ ,  $\phi_{lu}$  and  $\phi_l$  are decreasing functions, if we assume that  $\sigma_n$  is constant, nontrivial solutions for  $\hat{L}^*$ ,  $\hat{N}_i^*$  and  $\hat{N}_u^*$  are each unique.

$$\hat{L}^* = \frac{\sigma_n \phi_n \phi_l \hat{L}^*}{1 + \alpha \phi_l \hat{L}^*},$$

$$\hat{N}_i^* = \frac{\phi_{li}(\hat{N}_i^*) \sigma_n \phi_n \hat{N}^*}{1 + \alpha \phi_l \phi_n \hat{N}^*},$$

$$\hat{N}_u^* = \frac{\phi_{lu}(\hat{N}_i^*) \sigma_n \phi_n \hat{N}^*}{1 + \alpha \phi_l \phi_n \hat{N}^*},$$

## C Appendix C

Three distinct cases of phenological patterns are relevant to this system: (1) Emergence of both tick stages overlap and larvae finish emerging before nymphs finish emerging (2) Emergence of both tick stages overlap and nymphs finish emerging before larvae finish emerging (3) Nymph emergence ends before larvae emergence begins. Each case needs to be analyzed separately to account for the time dependent differences in the dynamics.

As a reminder:  $t_{l0}$  = start of larval emergence,  $t_{n0}$  = start of nymphal emergence,  $t_{lf}$  = end of larval activity,  $t_{nf}$  = end of nymphal activity.  $t_{n0}$  and  $t_{nf}$  determine where host peak infection will occur.  $t_{nf}$  determines how quickly host peak infection will be reached.  $t_{l0} > 0$  corresponds to larval activity beginning after nymphal activity; thus  $t_{l0}$  determines where in time the larval activity will begin overlapping with any infected hosts that may be present.  $t_{l0}$  and  $t_{lf}$  together determine the extent that larval activity coincides with host infection. Parasite transmission efficiency is maximized when peak larval activity coincides with peak host prevalence.

Using Case 1 as an example:

$$\begin{aligned} \hat{N}_i(T+1) &= \sigma_l(L_f(\tau)) \frac{\gamma_l \beta_{ml} \hat{L}^*}{l_l(\gamma_l M + \mu_l)} \frac{\gamma_n \beta_{nm} \hat{N}_i(T) M}{l_n(\gamma_n M + \mu_n)} \left( \int_0^{t_{lf}-t_{l0}} 1 - e^{-(\gamma_l M + \mu_l)t} \int_0^t M_{i1}(s+t_{l0}, \hat{N}_i(T)) ds dt \right) \\ &+ L_q(t_{lf}) \frac{\gamma_n \beta_{nm} \hat{N}_i(T) M}{l_n(\gamma_n M + \mu_n)} \left( \int_0^{t_{nf}-t_{lf}} e^{-(\gamma_n M + \mu_n)t} \int_0^t M_{i1}(s+t_{lf}, \hat{N}_i(T)) ds dt \right) \\ &+ \int_0^{\tau-t_{nf}} e^{-(\gamma_n M + \mu_n)(t+t_{nf}-t_{lf})} \int_0^t M_{i2}(s, \hat{N}_i(kT)) ds dt \\ R_0 &= \frac{\hat{N}_i(T+1)}{\hat{N}_i(T)} = \sigma_l(L_f(\tau)) \frac{\gamma_l \beta_{ml} \hat{L}^*}{l_l(\gamma_l M + \mu_l)} \frac{\gamma_n \beta_{nm} M}{l_n(\gamma_n M + \mu_n)} \left( \int_0^{t_{lf}-t_{l0}} 1 - e^{-(\gamma_l M + \mu_l)t} \right. \\ &\int_0^t M_{i1}(s+t_{l0}, \hat{N}_i(T)) ds dt \left. + L_q(t_{lf}) \frac{\gamma_n \beta_{nm} M}{l_n(\gamma_n M + \mu_n)} \left( \int_0^{t_{nf}-t_{lf}} e^{-(\gamma_n M + \mu_n)t} \right. \right. \\ &\left. \left. \int_0^t M_{i1}(s+t_{lf}, \hat{N}_i(T)) ds dt + \int_0^{\tau-t_{nf}} e^{-(\gamma_n M + \mu_n)(t+t_{nf}-t_{lf})} \int_0^t M_{i2}(s, \hat{N}_i(T)) ds dt \right) \right) \end{aligned}$$

for  $\hat{N}_i(T) = 1$ , parasites persist in phenological scenarios where  $\hat{N}_i(T+1) \geq 1$ .

When  $R_0 > 1$ , the number of infected nymphs,  $\hat{N}_i$  reaches a stable T-periodic equilibrium

$$\hat{N}_i^* = \hat{N}^* - \hat{N}_u^*$$

$\hat{N}_i^*$  for a given phenological scenario can be found by solving for the value of  $\hat{N}_i$  that satisfies  $R_0 = 1$ . Again, using Case 1 as an example:

$$\begin{aligned} 1 &= \sigma_l(L_f(\tau)) \frac{\gamma_l \beta_{ml} \hat{L}^*}{l_l(\gamma_l M + \mu_l)} \frac{\gamma_n \beta_{nm} M}{l_n(\gamma_n M + \mu_n)} \left( \int_0^{t_{lf}-t_{l0}} 1 - e^{-(\gamma_l M + \mu_l)t} \int_0^t M_{i1}(s+t_{l0}, \hat{N}_i^*) ds dt \right) \\ &+ L_q(t_{lf}) \frac{\gamma_n \beta_{nm} M}{l_n(\gamma_n M + \mu_n)} \left( \int_0^{t_{nf}-t_{lf}} e^{-(\gamma_n M + \mu_n)t} \int_0^t M_{i1}(s+t_{lf}, \hat{N}_i^*) ds dt \right) \\ &+ \int_0^{\tau-t_{nf}} e^{-(\gamma_n M + \mu_n)(t+t_{nf}-t_{lf})} \int_0^t M_{i2}(s, \hat{N}_i^*) ds dt \end{aligned}$$

The total tick population is marginally stable (see Appendix A).  $\hat{N}_i^*$  is upper bounded by  $\hat{N}^*$  and is therefore marginally stable.
